# Supplementary material for: A standardized workflow for respiratory‐gated motion management decision‐making
Source: PubMed Central journal article supplement (PMC9359043; doi:10.1002/acm2.13705), 2022-06-23

**XXXX Cancer Center  
Radiation Oncology  
Special Physics Consult  
4D CT Sim**

Patient Name:  
MRN:  
Date of Service:  
Requested by: [MD Name]

A member of the physics faculty from the Department of Radiation Oncology was asked to consult on the optimal radiation therapy treatment approach due to respiration-induced motion in the treatment area. The evaluation and recommendations are listed below.

A 4D CT simulation using the RPM system was performed to determine the range of motion of the tumor. The patient's breathing pattern was carefully monitored, and imaging parameters were determined to maximize image quality for tumor delineation and radiation therapy treatment planning.

**Site** (drop down): RUL lung; RLL lung; RML lung; LUL lung; LLL lung; Liver; Pancreas; Other (see details below)

Additional information: free text

**Recommendations:**

Gating Technique (drop-down): Gate100; Gate3070; Gate4060; NoGate

Treatment Planning

PTV margins (drop-down): 5 mm Isotropic (Lung/GI Standard); 5 mm Radial, 8 mm S/I (Lung Extended); 5 mm Radial, 7 mm S/I (GI Extended); 2 mm Isotropic (Pancreas with Fiducials); 5 mm Isotropic (Pancreas without Fiducials); Other (see details below)

Additional information: free text

Images for ITV delineation:

| Phases                               | MIP                              | MIN                              | EBHC                          |
|--------------------------------------|----------------------------------|----------------------------------|-------------------------------|
| <input type="checkbox"/> 0%/50%      | <input type="checkbox"/> MIP100  | <input type="checkbox"/> MIN100  | <input type="checkbox"/> EBHC |
| <input type="checkbox"/> 30%/50%/70% | <input type="checkbox"/> MIP3070 | <input type="checkbox"/> MIN3070 | <input type="checkbox"/> None |
| <input type="checkbox"/> 40%/50%/60% | <input type="checkbox"/> MIP4060 | <input type="checkbox"/> MIN4060 |                               |
| <input type="checkbox"/> None        | <input type="checkbox"/> None    | <input type="checkbox"/> None    |                               |

Additional information: free text

Images for treatment planning/dose calculation (drop-down): AVG100; AVG3070; AVG4060

### Treatment Delivery

Fluoro at treatment (drop-down): None; AP/PA; AP/PA and Lateral

Gating structure for fluoro (drop-down): NA; ITV; Fiducials; Surgical Clips; Other (see details below)

Images for contouring surrogate gating structure (drop-down): NA; 0/50% phases and MIP100; 30/50/70% phases and MIP3070; 40/50/60% phases and MIP4060; Other (see details below)

Gating window selection (drop-down): Normal; Conservative

Additional information: free text

### **Justification:**

Structure that was assessed (drop-down): Target; Fiducials; Surgical Clips; Other (see details below)

Additional information: free text

Motion was reliably evaluated over phases (drop-down): 0-50%; 30-70%; 40-60%; Could not be reliably evaluated (see details below)

Additional information: free text

Measured motion over the above phases:

- S/I (drop-down): ≤5 mm; 5-15 mm; >15 mm
- A/P (drop-down): ≤5 mm; 5-15 mm; >15 mm
- L/R (drop-down): ≤5 mm; 5-15 mm; >15 mm

Selected gating will reduce motion to:

- S/I (drop-down): No change (Gate100/NoGate); <2 mm; 2-4 mm; 4-6mm; >6 mm
- A/P (drop-down): No change (Gate100/NoGate); <2 mm; 2-4 mm; 4-6mm; >6 mm
- L/R (drop-down): No change (Gate100/NoGate); <2 mm; 2-4 mm; 4-6mm; >6 mm

Additional comments: free text

### **Screenshot of anatomy that was assessed, and breathing trace:**

(include coronal and sagittal view and breathing trace of slab containing tumor/fiducial)

**XXXX Cancer Center  
Radiation Oncology  
Special Physics Consult  
4D CT Sim**

Patient Name: JOHN DOE  
MRN: 12345678  
Date of Service: 3/1/2021  
Requested by: Jane Smith

A member of the physics faculty from the Department of Radiation Oncology was asked to consult on the optimal radiation therapy treatment approach due to respiration-induced motion in the treatment area. The evaluation and recommendations are listed below.

A 4D CT simulation using the RPM system was performed to determine the range of motion of the tumor. The patient's breathing pattern was carefully monitored, and imaging parameters were determined to maximize image quality for tumor delineation and radiation therapy treatment planning.

**Site: LLL Lung**

Additional information:

**Recommendations:**

Gating Technique: Gate4060

Treatment Planning

PTV margins: 5 mm Radial, 8 mm S/I (Lung Extended)

Additional information: Suspect difficulty observing tumor clearly on CBCT due to large amount of motion sup-inf and small size, so recommend extended margin

Images for ITV delineation:

| Phases                                          | MIP                                      | MIN                                      | EBHC                                     |
|-------------------------------------------------|------------------------------------------|------------------------------------------|------------------------------------------|
| <input type="checkbox"/> 0%/50%                 | <input type="checkbox"/> MIP100          | <input type="checkbox"/> MIN100          | <input type="checkbox"/> EBHC            |
| <input type="checkbox"/> 30%/50%/70%            | <input type="checkbox"/> MIP3070         | <input type="checkbox"/> MIN3070         | <input checked="" type="checkbox"/> None |
| <input checked="" type="checkbox"/> 40%/50%/60% | <input type="checkbox"/> MIP4060         | <input type="checkbox"/> MIN4060         |                                          |
| <input type="checkbox"/> None                   | <input checked="" type="checkbox"/> None | <input checked="" type="checkbox"/> None |                                          |

Additional information: Must contour using individual phase images as diaphragm will obscure tumor in MIP.

Images for treatment planning/dose calculation: AVG4060

## Treatment Delivery

Fluoro at treatment: None

Gating structure for fluoro: NA

Images for contouring surrogate gating structure: NA

Gating window selection: Conservative

Additional information: Tumor will not be visible on fluoro due to small size and position behind diaphragm.

## **Justification:**

Structure that was assessed: Target

Additional information:

Motion was reliably evaluated over phases: 0-50%

Additional information:

Measured motion over the above phases:

- S/I >15 mm
- A/P ≤5 mm
- L/R ≤5 mm

Selected gating will reduce motion to:

- S/I: 4-6 mm
- A/P: <2 mm
- L/R: <2 mm

Additional comments:

## **Screenshot of anatomy that was assessed, and breathing trace:**

(Include coronal and sagittal view and breathing trace of slab containing tumor/fiducial)

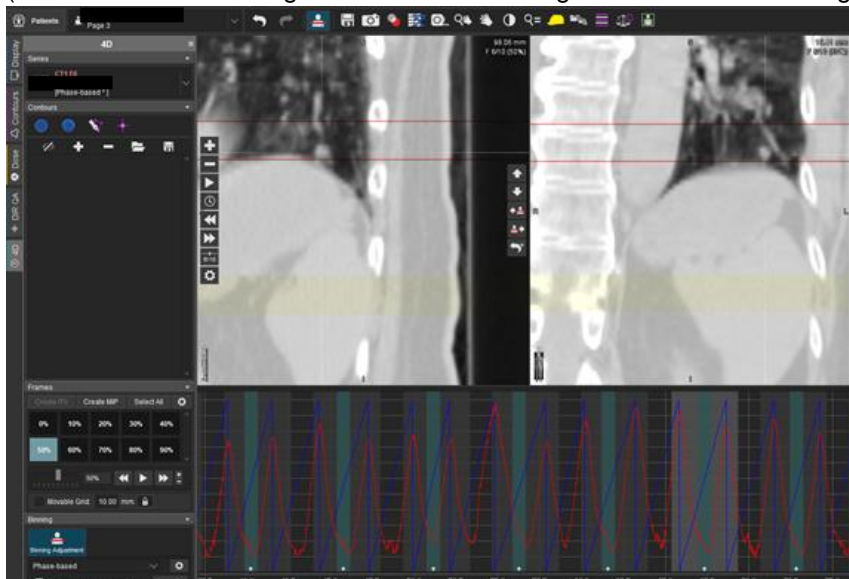

Supplement: ACM2-23-e13705-s001.pdf [file ACM2-23-e13705-s001.pdf]
